# Supplementary material for: Tissue-specific oxidative stress and element distribution after oral exposure to titanium dioxide nanoparticles in rats
Source: Royal Society of Chemistry journal article supplement (doi:10.1039/d0nr05591c), 2020-01-01
Supplement: d0nr05591c1.pdf [file d0nr05591c1.pdf]

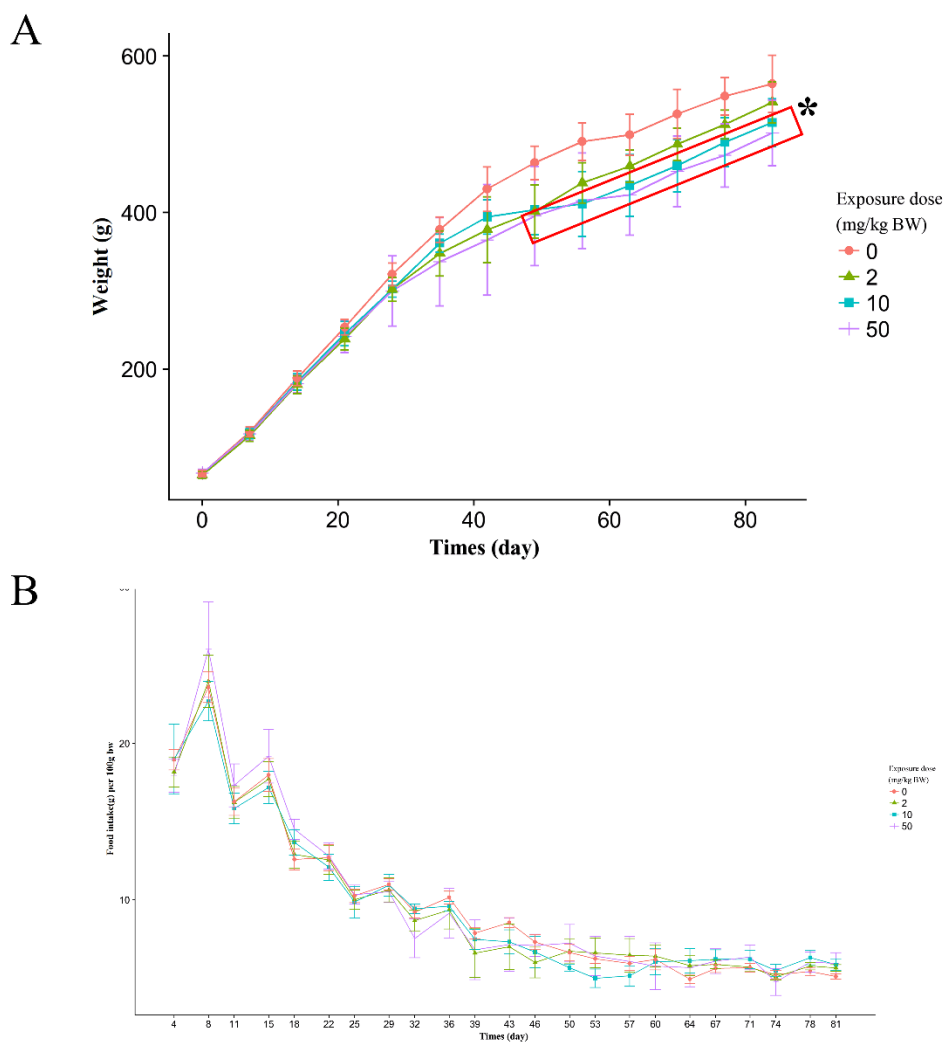

**Figure S1.** Body weight and food intake of the rats after oral exposure to TiO<sub>2</sub> nanoparticles for 90 days (mean ± SD, n = 6). From week 8 to week 13, the body weight of rats in the groups treated with 10 and 50 mg/kg TiO<sub>2</sub> NPs decreased compared with that in the control group. \**p* < 0.05

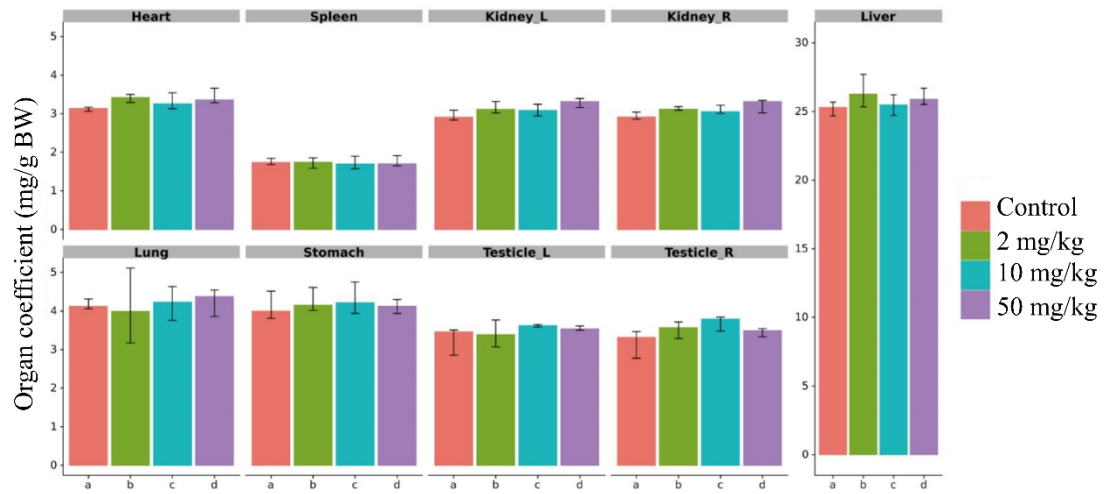

**Figure S2.** Organ coefficients of the rats after oral exposure to TiO<sub>2</sub> nanoparticles for 90 days (mean ± SD, n = 6). Kidney\_L, left kidney; Kidney\_R, right kidney; Testicle\_L, left testicle; Testicle\_R, right testicle.
